# Supplementary material for: Improvement of transport properties and hydrogen permeation of chemically-stable proton-conducting oxides based on the system BaZr1-x-yYxMyO3-δ
Source: Royal Society of Chemistry journal article supplement (doi:10.1039/c2ra20214j), 2012-01-01
Supplement: c2ra20214j.pdf [file c2ra20214j.pdf]

## Supplementary Information

From “Improvement of transport properties and hydrogen permeation of chemically-stable proton conducting oxides bases on the system  $\text{BaZr}_{1-x-y}\text{Y}_x\text{M}_y\text{O}_{3-\delta}$ ” by Sonia Escolástico<sup>1</sup>, Mariya Ivanova<sup>2</sup>, Cecilia Solís<sup>1</sup>, Stefan Roitsch<sup>3</sup>, Wilhelm A. Meulenberg<sup>2</sup>, José M. Serra<sup>1,\*</sup>

<sup>1</sup>Instituto de Tecnología Química (Universidad Politécnica de Valencia – Consejo Superior de Investigaciones Científicas), Av. Naranjos s/n, E-46022 Valencia (SPAIN)

<sup>2</sup>Forschungszentrum Jülich GmbH, Institute of Energy and Climate Research-IEK-1, Leo-Brandt-Str. 1, D-52425 Jülich, Germany

<sup>3</sup>Ernst Ruska-Centre for Microscopy and Spectroscopy with Electrons, RWTH Aachen University, Ahornstr. 55, 52074 Aachen, Germany

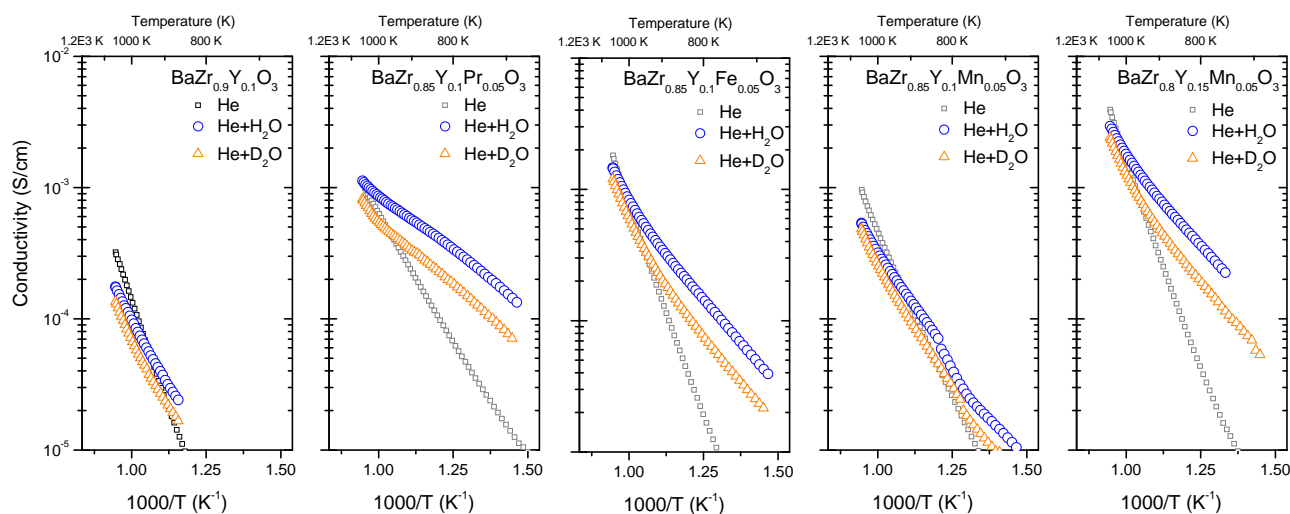

**Figure S1:** Total conductivity against inverse of temperature in dry helium, helium saturated with water and helium saturated with deuterated water at room temperature of  $\text{BaZr}_{0.95}\text{Y}_{0.1}\text{O}_{3-\delta}$ ,  $\text{BaZr}_{0.85}\text{Y}_{0.1}\text{Pr}_{0.05}\text{O}_{3-\delta}$ ,  $\text{BaZr}_{0.85}\text{Y}_{0.1}\text{Fe}_{0.05}\text{O}_{3-\delta}$ ,  $\text{BaZr}_{0.85}\text{Y}_{0.1}\text{Mn}_{0.05}\text{O}_{3-\delta}$ ,  $\text{BaZr}_{0.8}\text{Y}_{0.15}\text{Mn}_{0.05}\text{O}_{3-\delta}$ .

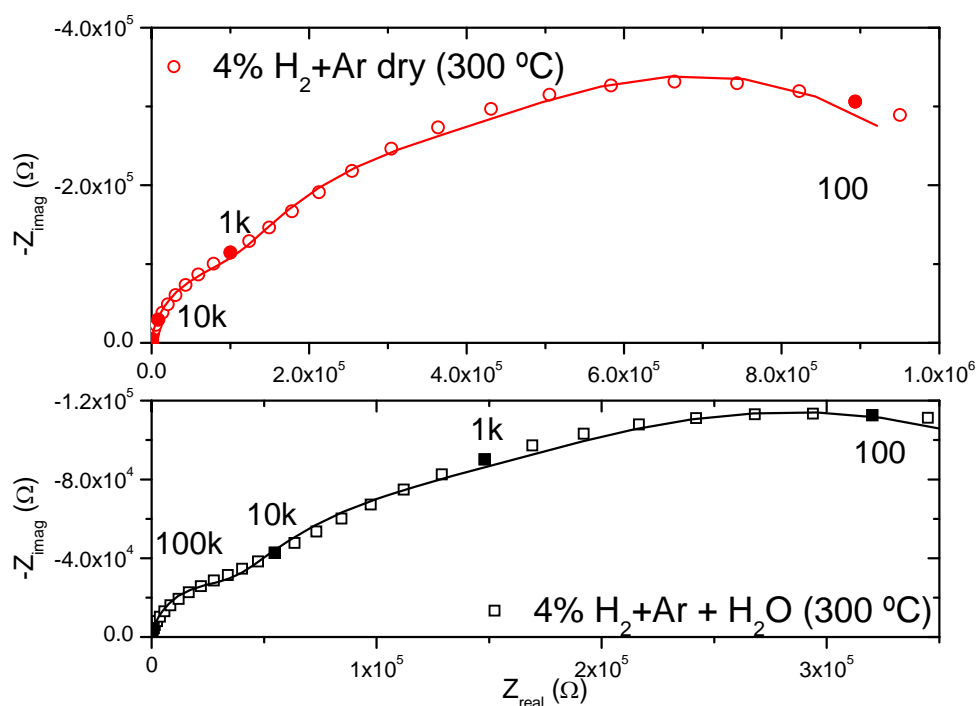

**Figure S2** shows impedance spectra of the  $\text{BaZr}_{0.8}\text{Y}_{0.15}\text{Mn}_{0.05}\text{O}_{3-\delta}$  sample, recorded at 300 °C in 4%  $\text{H}_2+\text{Ar}$  in dry (top) and wet (bottom) atmospheres. The open symbols represent the experimental data and lines the fits to a model with three in serie RQ elements. The three different contributions, observed at different frequencies, can be associated to different processes: (1) the high frequency semicircle (200-500 kHz) can be associated to the bulk resistivity (pseudo-capacitances of  $5.9\text{-}6.0 \times 10^{-11}$  F); (2) a second high frequency contribution but lower frequencies than the first one (12-25 kHz) with pseudo-capacitances of  $2.8\text{-}4.4 \times 10^{-10}$  is not easily associated to any specific process; and (3) the intermediate frequency arc (1.05-1.36 kHz) associated to the grain boundaries resistivity (pseudo-capacitances of  $1.0\text{-}2.8 \times 10^{-9}$  F). The most important contribution to the total sample resistance is the one related to grain boundary transport. Similar values of bulk and grain boundaries associated pseudo-capacitances have been observed by Ricote et al. [25, 26] for  $\text{BaZr}_{0.9}\text{Y}_{0.1}\text{O}_{3-\delta}$  in 9%  $\text{H}_2+\text{N}_2+\text{H}_2\text{O}$  at 370 °C.
